1 ***Klebsiella pneumoniae* exhibiting a phenotypic hyper-splitting phenomenon including the**  
2 **formation of small colony variants**

3

4 Eyüp Doğan<sup>1</sup>, Katharina Sydow<sup>2</sup>, Stefan E. Heiden<sup>2</sup>, Elias Eger<sup>2</sup>, Georgi Wassilew<sup>3</sup>, Richard  
5 A. Proctor<sup>4</sup>, Jürgen A. Bohnert<sup>1</sup>, Evgeny A. Idelevich<sup>1,5</sup>, Katharina Schaufler<sup>2,6#</sup>, Karsten  
6 Becker<sup>1#</sup>

7 # shared last

8

9 <sup>1</sup> Friedrich Loeffler-Institute of Medical Microbiology, University Medicine Greifswald,  
10 Greifswald, Germany.

11 <sup>2</sup> Department of Epidemiology and Ecology of Antimicrobial Resistance, Helmholtz Institute  
12 for One Health, Helmholtz Centre for Infection Research HZI, Greifswald, Germany.

13 <sup>3</sup> Center for Orthopedics, Trauma Surgery and Rehabilitation Medicine, University Medicine  
14 Greifswald, Greifswald, Germany.

15 <sup>4</sup> Departments of Medical Microbiology/Immunology and Medicine, University of Wisconsin  
16 School of Medicine and Public Health, Madison, WI, United States.

17 <sup>5</sup> Institute of Medical Microbiology, University Hospital Münster, Münster, Germany.

18 <sup>6</sup> University Medicine Greifswald, Greifswald, Germany.

19

20 **Abstract**

21 In this study, we characterized a *Klebsiella pneumoniae* strain in a patient with shrapnel hip  
22 injury, which resulted in multiple phenotypic changes, including the formation of a small  
23 colony variant (SCV) phenotype. Although already described since the 1960s, there is little  
24 knowledge about SCV phenotypes in *Enterobacteriaceae*. The formation of SCVs has been  
25 recognized as a bacterial strategy to evade host immune responses and compromise the efficacy  
26 of antimicrobial therapies, leading to persistent and recurrent courses of infections. In this case,  
27 14 different, clonally identical resisto- and morpho-types were distinguished from the patient's  
28 urine and tissue samples. Whole genome sequencing revealed the *K. pneumoniae* high-risk  
29 clonal lineage belonging to sequence type 147. Subculturing the SCV colonies consistently  
30 resulted in the reappearance of the initial SCV phenotype and three stable normal-sized  
31 phenotypes with distinct morphological characteristics. Additionally, an increase in resistance  
32 was observed over time in isolates that shared the same colony appearance. Our findings  
33 highlight the complexity of bacterial behavior by revealing a case of phenotypic “hyper-  
34 splitting” in a *K. pneumoniae* SCV and its potential clinical significance.

35

## 36 **Introduction**

37 *Klebsiella pneumoniae*, an opportunistic pathogen known for its ability to cause a wide range  
38 of nosocomial and community-acquired infections, has emerged as a significant public health  
39 threat due to its strain-specific, extensive arsenal of resistance and virulence factors (1, 2).  
40 Infections caused by multi-, extensively-, and pandrug-resistant strains result in high mortality  
41 due to limited response to antibiotic therapy, which poses an increasing threat (3-5). Apart from  
42 classic strains, a hypervirulent *K. pneumoniae* (hvKp) pathotype occurs and is characterized by  
43 invasive, often life-threatening and multiple site infection, characteristically in healthy patients  
44 from the general population (6). In addition, convergent types that successfully combine  
45 resistance and hypervirulence represent a “perfect storm” and have been increasingly reported  
46 in recent years (7-9).

47 Beyond typical resistance mechanisms against various antimicrobials, functional resistance  
48 mechanisms have been elucidated that lead to antimicrobial treatment failure and foster the  
49 development of relapses and persistent infections (10). The formation of a biofilm matrix  
50 represents one of these mechanisms that facilitates antibiotic tolerance and the generation of  
51 bacterial persister cells (10). Interestingly, it has been demonstrated that a decrease in capsule  
52 biosynthesis, which is crucial for hypervirulent phenotypes, leads to increased *in vitro* biofilm  
53 formation and intracellular persistence (11). Another non-classical mechanism leading to  
54 functional resistance is the formation of the small colony variant (SCV) phenotype. SCVs are  
55 subpopulations of bacteria that exhibit slow growth, reduced colony size, and altered  
56 phenotypic properties compared to their normal-growing counterparts, making them difficult  
57 to detect and treat effectively (12, 13). Their ability to evade the host's immune surveillance  
58 and to undermine the effectiveness of antimicrobial interventions by host cell internalization  
59 results in intracellular persistence, which contributes significantly to the recurrence and  
60 chronicity of the infection (14, 15). Another pivotal attribute facilitating this phenomenon is  
61 their capability to modulate metabolic processes and virulence characteristics (16, 17).

62 Hypermutator SCVs characterized by higher mutation frequencies than wild-type strains and  
63 isolated especially from cystic fibrosis (CF) patients (18, 19) have also been associated with  
64 antibiotic resistance (20, 21) and biofilm formation (22).

65 To date, research has focused on staphylococcal SCVs, while SCVs of Gram-negative bacteria  
66 have been investigated in only a few studies and case reports (12). Although the formation of  
67 small colonies in *K. pneumoniae* has been noticed during resistance studies against  
68 cephalosporins in the mid-1960s (23), this issue has not received sufficient attention and  
69 detailed research has not been conducted on this subject. The first clearly defined SCV of *K.*  
70 *pneumoniae* (SCV-Kp) in literature was obtained by *in vitro* exposure to gentamicin (24). SCV-  
71 Kp were also isolated from a patient treated with aminoglycoside antibiotics (25). Smaller and  
72 non-mucoid colonies were obtained as a result of conjugation-induced mutation in the outer  
73 membrane protein of a hypervirulent *K. pneumoniae* isolate (26). Another study showed that  
74 biofilm-forming *K. pneumoniae* developed heteroresistance to colistin by presenting slow-  
75 growing SCV-Kp (27).

76 Here, we report on *K. pneumoniae* isolates displaying 14 different resisto- and morpho-types  
77 obtained from an immunocompetent male patient, who had sustained a traumatic injury caused  
78 by shrapnel shell fragments. The isolates comprise an initial, mostly susceptible *K. pneumoniae*  
79 isolate with typical morphological characteristics isolated from the patient's urinary specimen.  
80 From the urine and tissue samples, 13 additional phenotypes with different combinations of  
81 resistance and morphological characteristics including *K. pneumoniae* SCV phenotypes were  
82 isolated.

83

## 84 **Methods**

85 **Patient data.** Sufficient information could not be obtained regarding the period from the  
86 patient's first acetabular and femoral head shrapnel-caused war injury in Ukraine in March  
87 2022, where he underwent hip prosthesis at an external center before his transfer to our

88 orthopedic service in July 2022. Fracture-related joint infection treatment in our hospital  
89 continued through November 2022. The administration of antibiotics during this period  
90 included piperacillin/tazobactam from July to October, 2022, trimethoprim/sulfamethoxazole  
91 from July to August, 2022, cefiderocol from August to November, 2022, and colistin from  
92 October to November, 2022. Daptomycin was introduced into the treatment protocol starting  
93 from October 2022 upon detection of *Staphylococcus epidermidis* from tissue samples and  
94 central venous catheter tip, and continued until the patient's discharge. Subsequently, a planned  
95 course of post-discharge antibiotic suppression therapy with doxycycline for three months was  
96 initiated. The first identification of carbapenem-resistant *K. pneumoniae* (CRKP) occurred in  
97 July 2022, followed by the initial detection of SCV-Kp in September 2022. Therefore, we  
98 decided to aggregate and systematically assess the entirety of *K. pneumoniae* strains isolated  
99 from the patient.

100 **Strain identification.** The urine sample obtained from the patient was quantitatively inoculated  
101 onto a Columbia agar plate with 5% sheep blood (BD Diagnostics, Heidelberg, Germany) and  
102 a MacConkey II-Agar plate (BD Diagnostics) using a 10 µl disposable sterile loop. The plates  
103 were then incubated for 48 hours. Tissue samples collected during surgery were inoculated onto  
104 Columbia agar plates with 5% sheep blood, MacConkey II-Agar plates, and Mueller Hinton  
105 Chocolate agar plates (all from BD Diagnostics). These plates were incubated under  
106 capnophilic conditions for up to seven days. The remaining tissue material was inoculated onto  
107 Schaedler agar and into BBL Fluid Thioglycollate media (both from BD Diagnostics) and  
108 incubated for up to 14 days under anaerobic and capnophilic conditions, respectively.

109 Preliminary characterization of each phenotype was grounded in colony morphology and  
110 minimal inhibitory concentration (MIC) results for antibiotics encompassed within the  
111 VITEK® 2 AST card specific to *Enterobacterales* (bioMérieux SA, Marcy l'Étoile, France)  
112 according to EUCAST criteria. All *K. pneumoniae* strains, isolated from various patient's  
113 specimens during the period from July to December 2022, were identified by matrix-assisted

114 laser desorption/ionization time-of-flight mass spectrometry (MALDI-TOF MS) utilizing the  
115 MALDI Biotyper® sirius system (Bruker Daltonics, Bremen, Germany) with MBT Biotargets  
116 96 (Bruker Daltonics). The presence of carbapenemase-encoding genes was verified by a loop-  
117 mediated isothermal amplification (LAMP)-based assay (eazyplex®, AmplexDiagnostics,  
118 Gars-Bahnhof, Germany).

119 **Characterization of the phenotypes.** Sequential subcultures of all phenotypic variants were  
120 carried out on various agar plates (including Columbia agar + 5% sheep blood, MacConkey  
121 agar from BD, and CHROMID® CPS® Elite agar from bioMérieux) to observe whether  
122 changes in colony morphology occurred and SCVs remained stable, followed by meticulous  
123 analysis of generated phenotypic profiles.

124 In order to determine colony sizes, each phenotype was inoculated onto 5% sheep blood agar  
125 plates in triplicate on different days. After overnight incubation at  $35\pm 1^\circ\text{C}$  in ambient air, the  
126 diameters of ten colonies were measured on each plate and mean values were determined.

127 **Antimicrobial susceptibility testing.** In addition to the initial VITEK® 2 AST, the MICs of a  
128 standardized set of antibiotics were determined by the broth microdilution (BMD) method using  
129 cation-adjusted Mueller–Hinton broth (CAMHB; Micronaut-S 96-well microtiter plates,  
130 Merlin, Bornheim-Hersel, Germany), and for cefiderocol using iron-depleted CAMHB  
131 (UMIC®, Merlin, Bornheim-Hersel, Germany), as recommended by ISO 20776-1, the  
132 European Committee on Antimicrobial Susceptibility Testing (EUCAST), and the Clinical and  
133 Laboratory Standards Institute (CLSI) guidelines (28-30). The results were observed following  
134  $18\pm 2$  hours of incubation at  $35\pm 1^\circ\text{C}$  in ambient air. All tests were conducted in triplicate on  
135 different days, and median MIC values were computed for analysis. *Escherichia coli* ATCC  
136 25922, *E. coli* ATCC 35218, *K. pneumoniae* ATCC 700603, and *Pseudomonas aeruginosa*  
137 ATCC 27853 were used as quality control (QC) strains, and their results were within the QC  
138 range throughout the study. EUCAST Clinical Breakpoint Tables v. 13.1 were used for MIC  
139 interpretation (31).

140 **DNA isolation and sequencing.** After overnight growth on blood agar plates at 37 °C, ten  
141 colonies were randomly selected and suspended in 1.5 mL tubes (Carl Roth, Karlsruhe,  
142 Germany) with 1 mL of phosphate buffered saline. Total DNA was extracted using the  
143 MasterPure DNA Purification kit for Blood, v. 2 (Lucigen, Middleton, WI, USA) according to  
144 the manufacturer's instructions. Quantification of isolated DNA was performed with the Qubit  
145 4 fluorometer and the dsDNA HS Assay kit (Thermo Fisher Scientific, Waltham, MA, USA).  
146 DNA was sent to SeqCenter (Pittsburgh, PA, USA), where sample library preparation using the  
147 Illumina DNA Prep kit and IDT 10bp UDI indices was performed. Subsequently, libraries were  
148 sequenced on an Illumina NextSeq 2000, producing 2x151bp reads. Demultiplexing, quality  
149 control and adapter trimming at the sequencing center was performed with bcl-convert v. 3.9.3  
150 ([https://support-](https://support-docs.illumina.com/SW/BCL_Convert/Content/SW/FrontPages/BCL_Convert.htm)  
151 [docs.illumina.com/SW/BCL\\_Convert/Content/SW/FrontPages/BCL\\_Convert.htm](https://support-docs.illumina.com/SW/BCL_Convert/Content/SW/FrontPages/BCL_Convert.htm)).

152 **Assembly and genomic characterization.** We employed a custom assembly and polishing  
153 pipeline to assemble raw sequencing reads to contigs. This pipeline consists of four parts,  
154 namely trimming (BBduk from BBTools v. 38.98 [<https://sourceforge.net/projects/bbmap/>],  
155 quality control (FastQC v. 0.11.9 [<https://www.bioinformatics.babraham.ac.uk/projects/fastqc/>]), assembly (shovill v. 1.1.0  
156 [<https://github.com/tseemann/shovill>]) with SPAdes v. 3.15.5 (32), and polishing (BWA-  
157 MEM2 v. 2.2.1 (33), Polypolish v. 0.5.0 (34)).

159 Genotyping was performed with Kleborate v. 2.2.0 (35) and Kaptive (36, 37).

160 **Confirmation of clonality.** Trimmed sequencing reads of all isolates were mapped against  
161 isolate 1-A with snippy v. 4.6.0 (<https://github.com/tseemann/snippy>) and the SNP distance  
162 matrix calculated with snp-dists v. 0.8.2 (<https://github.com/tseemann/snp-dists>).

163

164 **Results**

165 Overall, 14 distinct phenotypes were determined (Table 1). From the urine, two phenotypes (1-  
166 A and 1-B) exhibiting a normal colony size and glistening surface but differing in the color of  
167 their colonies displaying whitish or grey colonies, were isolated. All other phenotypes (n = 12)  
168 were isolated from tissue specimens. Strains numbered 1-A, 2-A, 3-A, 4-B, 5-B, numbered 1-  
169 B, 2-B, 3-B, 4-C, 5-C, and numbered 4-D, 5-D, displayed identical morphological attributes  
170 each, distinguished by whitish, glistening, and smooth (Figure 1-A), grey, glistening, and  
171 smooth (Figure 1-B), and grey, dry, and rough colonies (Figure 1-C), respectively. These strains  
172 revealed a normal colony size of 2.4 mm on average (range, 1 – 5.5 mm). The isolates displaying  
173 the SCV phenotype, numbered 4-A and 5-A, exhibited similar morphological characteristics,  
174 and colony sizes were smaller than 0.5 mm (Figure 1-D). No discernible variation in terms of  
175 colony clustering was observed among the various agar plates.

176 Initially, largely antibiotic-susceptible *K. pneumoniae* phenotypes exhibiting whitish and grey  
177 colony morphologies on Columbia agar plates were isolated from the urine sample. Following  
178 antibiotic treatment, MDR *K. pneumoniae* strains displaying the normal colony size were  
179 isolated from tissue samples, again characterized by subsequent whitish or grey colony  
180 formations. Subsequently, SCVs of *K. pneumoniae* were isolated from tissue samples.  
181 Subcultivation of different SCV colonies consistently yielded a division into four distinct  
182 colony morphotypes including one SCV phenotype that resembled the initial SCV, along with  
183 three normal-sized phenotypes distinguished by variations in colony color and visual attributes.  
184 While normal-sized phenotypes exhibited stability following each round of re-cultivation, SCV  
185 isolates displayed instability and recurrently diverged into the four phenotypes described above.  
186 We have designated the emergence of these multiple phenotypes as “hyper-splitting”. Despite  
187 minor variations in MIC values, these “hyper-splitting” phenotypes exhibited multidrug  
188 resistance (Table 1).

189 Except for isolates 1-A and 1-B, all isolates were resistant to the tested carbapenems. Initially,  
190 during routine diagnosis, isolate 2-B was found to be carbapenem-resistant by VITEK® 2 AST,



191 and to harbor *bla*<sub>OXA-48</sub> gene by LAMP. After subcultivation of this isolate for MIC  
192 determination, this resistance disappeared and the isolate became susceptible to all tested beta-  
193 lactam antibiotics except piperacillin. Only isolates 1-A and 1-B were susceptible to  
194 piperacillin, and only isolate 4-B was not resistant to the cephalosporins tested. Interestingly,  
195 only isolates 4-A and 5-A, which demonstrated the SCV phenotype, were resistant to amikacin  
196 and trimethoprim-sulfamethoxazole. Another remarkable finding was the observed increase in  
197 the MIC values of cefiderocol and trimethoprim-sulfamethoxazole over time (Table 1).

198 Whole-genome sequence (WGS) analysis revealed that all isolates belonged to sequence type  
199 (ST) 147. Lipopolysaccharide antigen (O) loci were O1/O2v1 and capsule biosynthesis (KL)  
200 loci were KL64 for all isolates except isolate 4-D, which could not be assigned, as it missed  
201 most genes of this locus. Isolates 1-A, 1-B and 2-B showed lower Kleborate resistance score  
202 than the other isolates (resistance: 0 vs. 2). The resistance score of 0 indicates that the isolate(s)  
203 did not carry any genes for extended-spectrum beta-lactamases (ESBL) or carbapenemases and  
204 a score of 2 correlated with the presence of carbapenemase genes without colistin resistance  
205 genes (35). In accordance with the resistance scores, we detected several beta-lactamase genes,  
206 such as *bla*<sub>SHV-11</sub>, *bla*<sub>TEM-1</sub> and *bla*<sub>OXA-9</sub>, ESBL genes, such as *bla*<sub>CTX-M-15</sub> and *bla*<sub>OXA-1</sub>, and the  
207 carbapenemase genes *bla*<sub>NDM-1</sub> and *bla*<sub>OXA-48</sub>. *bla*<sub>SHV-11</sub> was found in all isolates whereas *bla*<sub>TEM-</sub>  
208 <sub>1</sub> and *bla*<sub>OXA-9</sub> were present in all isolates except 1-A and 1-B. However, *bla*<sub>CTX-M-15</sub> was not  
209 found in isolate 4-A. Genes associated with sulphonamide (*sulI*) and chloramphenicol (*catB3*)  
210 resistance were also detected in all isolates except 1-A, 1-B and 2-B (Table S1). Note that we  
211 did not detect any common cefiderocol resistance genes.

212 The isolates exhibited clonality as emphasized by the low number of SNPs among them (Table  
213 S1). Especially isolates from the same time point showed no difference in the core genome  
214 alignment (5,360,988 bp) with the exception of 2-A and 2-B (six SNPs) and 5-D (one additional  
215 SNP compared to 5-A–C). The largest distance with 17 SNPs was between 2-A and 5-D (Table  
216 S1).

217

## 218 **Discussion**

219 When evaluating the results, we can roughly identify three distinct outcomes. The first  
220 significant observation concerns the emergence of resistance development chronologically  
221 within a *K. pneumoniae* strain, originating from a patient subjected to continuous, uninterrupted  
222 antibiotic intervention. This scenario promptly elicits contemplation of the subject concerning  
223 within-host adaptive evolution of bacteria. In fact, in-host resistance evolution, either due to  
224 plasmid mediation or chromosome mutations, has been observed even shortly after the initiation  
225 of antimicrobial treatment (38).

226 The second notable observation in our study is the occurrence of SCVs from patient specimens  
227 following the detection of normal-sized morphotypes. SCVs demonstrate remarkable abilities  
228 to invade and persist within host cells, thus evading the surveillance mechanisms of the immune  
229 system (39). The existence of SCVs, mostly observed in *Staphylococcus* spp., has been  
230 documented since the onset of the 20th century and has gained increasing attention due to its  
231 potential implications for both clinical and basic research (12, 40). Regarding the SCVs of  
232 Gram-negative bacteria, studies have particularly focused on *Burkholderia* and *Pseudomonas*  
233 spp. isolated from CF patients (18, 41, 42). However, there are only sparse data on the  
234 occurrence of SCV in *Klebsiella* spp. (23-27).

235 Basically, SCVs have been determined as a subpopulation characterized by their distinct  
236 phenotypic properties, such as atypical colony morphologies including the reduced colony size  
237 (43). Their decreased growth rate is thought to contribute to their inherent resistance, given that  
238 the decelerated growth dynamics potentially hinder the effectiveness of antibiotics geared  
239 towards rapidly proliferating cell populations (44). Furthermore, this phenomenon concurrently  
240 signifies decreased metabolic activity, which may engender modifications in cell wall  
241 permeability, drug uptake, or the modulation of efflux pump expression (45).

242 For electron transport chain-defective staphylococcal SCVs, lower efficacy of aminoglycosides  
243 known to be taken up through electrical potential across the cytoplasmic membrane ( $\Delta\Psi$ ) was  
244 demonstrated, which is attributable to low  $\Delta\Psi$  (46). These alterations could collectively  
245 contribute to enhancing resistance patterns. In this study, we observed an increase in the MIC  
246 values of amikacin, cefiderocol, and trimethoprim-sulfamethoxazole in the isolates recovered  
247 over time. This MIC increase was especially pronounced for amikacin in SCV phenotypes.  
248 Moreover, most antibiotics penetrate into host cells poorly, so the concentrations required to  
249 kill intracellularly persistent SCVs cannot be achieved (12).

250 SCVs, known for their inducible formation through *in vitro* processes involving various agents,  
251 including antibiotics (23), have exhibited a propensity for increased persistence and adaptability  
252 when confronted with challenging environments (47). An enhanced ability to form biofilms on  
253 biotic and abiotic surfaces has been shown for SCVs of different bacterial species (41, 48-51).  
254 The substantial implication of SCVs extends to their involvement in biofilm development, as  
255 biofilms effectively shield bacteria from harsh host environments, thereby complicating the  
256 elucidation of drug resistance mechanisms within biofilm structures (52). Biofilms not only  
257 confer protection against host immune defenses but also serve as reservoirs for persistent  
258 infections and recurrent episodes (53). The impact of SCV phenotype on biofilm formation in  
259 in *Klebsiella* remains to be elucidated in further studies.

260 Furthermore, the emergence of SCVs could plausibly be due to selection pressure from  
261 antibiotic regimens or other host-associated factors, e.g., host cationic peptides. Consistent with  
262 the case that was the subject of our study, the higher frequency of SCVs in isolates from chronic  
263 and recurrent infections compared to acute infections suggests a potential role for these variants  
264 in evading host immune responses and antimicrobial treatments (12). In the context of our  
265 study, the emergence of SCVs after the initiation of cefiderocol treatment while already  
266 undergoing antibiotic therapy could be construed as a form of *in vivo* or *in host* induction.

267 The third noteworthy finding from our study underscores the inherent instability of SCVs. This  
268 dynamic interplay between stable and unstable SCVs is still poorly understood and its  
269 elucidation may contribute to a deeper understanding of their role in infection in general and  
270 persistence phenomena in particular (54). Despite comprehensive explorations largely focusing  
271 on staphylococci, a lack of investigations concerning *Klebsiella* spp. persists, and requires  
272 attention.

273 The observed instability among SCVs, combined with distinct antibiotic susceptibility profiles  
274 across phenotypes, increases the significance of investigating SCV plasticity (43). Stable SCVs  
275 represent a long-term adaptation strategy, whereas their unstable counterparts may arise as  
276 stress-induced variants that result from rapid adaptation to fluctuating environments (14, 55,  
277 56). This inherent instability potentially serves as a mechanism for evading host immune  
278 responses and circumventing antibiotic interventions (55). Furthermore, the involvement of  
279 epigenetic modifications, including alterations in DNA methylation patterns, could  
280 significantly influence SCV stability (57). In addition, regulatory systems, such as two-  
281 component systems and quorum sensing, play a crucial role in SCV formation by modulating  
282 bacterial behavior and adaptation. Disruption or dysregulation of these systems could lead to  
283 the emergence of SCVs with altered phenotypic properties (58). Due to instability, slow-  
284 growing SCVs may generate mutants that exhibit a faster growth rate than usual (59). In  
285 instances of reversion to the wild type, rapidly growing mutant revertants may demonstrate  
286 either the loss or preservation of antibiotic resistance (59).

287 A high mutation rate might favor the emergence of SCVs (20) and also explain the emergence  
288 of antibiotic resistance as a result of antibiotic selective pressure and the adaptation of  
289 hypermutable strains in patients, especially CF patients (19). CF-like chronic infections have  
290 been shown to specifically contribute to the development of bacterial mutations (60).  
291 Hypermutation could result in a subpopulation of bacteria that temporarily does not grow, thus  
292 leading to persistence (61). Additionally, an increase in the prevalence of mutator bacterial

293 strains with deficient DNA mismatch repair (MMR) system has been detected in CF patients,  
294 who are used as a reservoir for mutation (62). To our best knowledge, we were unable to identify  
295 any instance in the available literature wherein a solitary SCV colony has given rise to four  
296 distinct colonies exhibiting disparate morphologies. Accordingly, we suggest the designation  
297 "phenotypic hyper-splitting" for this distinctive phenomenon.

298 We described in this study unprecedented phenotypic attributes and primarily focused on *in*  
299 *vitro* experiments. Therefore, the clinical relevance of our findings necessitates validation  
300 through animal models and clinical sample analyses. In this context, macrophage and neutrophil  
301 assays would be valuable for assessing both the extent of immune response and the presence of  
302 persistent cells. Moreover, the determination of the auxotrophism (13, 17) of *K. pneumoniae*  
303 SCVs and of the molecular mechanisms that drive SCV formation and the resulting antibiotic  
304 resistance in this species require further investigation. Integrating a comprehensive range of  
305 approaches encompassing genomics, transcriptomics, and proteomics, the utilization of  
306 experimental evolutionary models can yield valuable insights into the genetic determinants and  
307 regulatory networks orchestrating SCV phenotypes.

308 The genomic analysis conducted in this study has revealed clonality among all 14 isolates.  
309 Further exploration is warranted to uncover the intricate molecular mechanisms underlying  
310 phenotypic hyper-splitting and to elucidate the potential pathogenic implications of this  
311 phenomenon. To better understand the formation of the SCV phenotype especially in Gram-  
312 negative pathogens, efforts need to be intensified (i) to improve the detection and  
313 characterization of SCVs recovered from clinical samples and (ii) to elucidate their clinical  
314 impact.

315

316 **Data availability**

317 The data for this study have been deposited in the European Nucleotide Archive (ENA) at  
318 EMBL-EBI under accession number PRJEB71325  
319 (<https://www.ebi.ac.uk/ena/browser/view/PRJEB71325>).

320

### 321 **Supplemental material**

322 **Table S1.** Core SNP distance matrix. The complete core genome alignment (gaps and  
323 ambiguous bases removed) contained 5,360,988 bp. The reference sequence for alignment was  
324 1-A.

325

### 326 **Acknowledgments**

327 We are grateful to Betty Nedow, Katrin Darm, Maysem Al-Baldawi and Sara-Lucia  
328 Wawrzyniak for their technical assistance.

329

### 330 **Funding**

331 This study was funded in part by a grant from the European Regional Development Fund  
332 (ERDF) to K.B. (grant number GHS-20-0010). Support was also obtained from a grant from  
333 the Federal Ministry of Education and Research (BMBF, Germany) to KSc entitled “Disarming  
334 pathogens as a different strategy to fight antimicrobial-resistant Gram-negatives” (01KI2015).

335

### 336 **Conflict of interest**

337 The authors declare no conflict of interest.

338

**Table 1.** Colony morphology and antimicrobial susceptibility characteristics of the 14 phenotypes of the *Klebsiella pneumoniae* strain

| 14 phenotypes of the <i>K. pneumoniae</i> strain |          |        |                      |                    | Median minimum inhibitory concentrations (MICs), µg/ml <sup>a</sup> |     |      |       |     |      |     |     |     |        |     |     |     |       |     |     |      |     |
|--------------------------------------------------|----------|--------|----------------------|--------------------|---------------------------------------------------------------------|-----|------|-------|-----|------|-----|-----|-----|--------|-----|-----|-----|-------|-----|-----|------|-----|
| Isolate number                                   | Specimen | Date   | Colony morphology    |                    | PIP                                                                 | TZP | TEM  | FDC   | CTX | CAZ  | CZA | C/T | IPM | MEM    | CIP | LVX | AMK | TGC   | CHL | CST | FOF  | SXT |
|                                                  |          |        | Color                | Surface            |                                                                     |     |      |       |     |      |     |     |     |        |     |     |     |       |     |     |      |     |
| 1-A                                              | Urine    | Jul 22 | Whitish              | Glistening, smooth | ≤8                                                                  | ≤4  | ≤32  | ≤0,03 | ≤1  | ≤1   | ≤1  | ≤1  | ≤1  | ≤0,125 | >2  | >2  | ≤4  | 0,5   | 16  | ≤1  | >128 | ≤1  |
| 1-B                                              |          |        | Grey                 | Glistening, smooth | ≤8                                                                  | ≤4  | ≤32  | ≤0,03 | ≤1  | ≤1   | ≤1  | ≤1  | ≤1  | ≤0,125 | >2  | >2  | ≤4  | 0,5   | 16  | ≤1  | >128 | ≤1  |
| 2-A                                              | Tissue   | Jul 22 | Whitish              | Glistening, smooth | >16                                                                 | >64 | >128 | 1     | >2  | >128 | >16 | >8  | >8  | 128    | >2  | >2  | 8   | 0,5   | >16 | ≤1  | >128 | ≤1  |
| 2-B                                              |          |        | Grey                 | Glistening, smooth | >16                                                                 | 8   | ≤32  | 0,06  | ≤1  | ≤1   | ≤1  | ≤1  | ≤1  | ≤0,125 | >2  | >2  | 8   | ≤0,25 | ≤8  | ≤1  | >128 | ≤1  |
| 3-A                                              | Tissue   | Aug 22 | Whitish              | Glistening, smooth | >16                                                                 | >64 | >128 | 1     | >2  | >128 | >16 | >8  | >8  | 128    | >2  | >2  | 8   | ≤0,25 | >16 | ≤1  | >128 | ≤1  |
| 3-B                                              |          |        | Grey                 | Glistening, smooth | >16                                                                 | >64 | >128 | 2     | >2  | >128 | >16 | >8  | >8  | 128    | >2  | >2  | 8   | ≤0,25 | >16 | ≤1  | >128 | ≤1  |
| 4-A                                              | Tissue   | Sep 22 | Small colony variant |                    | >16                                                                 | >64 | >128 | 0,25  | >2  | >128 | >16 | >8  | >8  | 128    | >2  | >2  | 32  | 0,5   | >16 | ≤1  | >128 | >4  |
| 4-B                                              |          |        | Whitish              | Glistening, smooth | >16                                                                 | 64  | >128 | 0,125 | 2   | ≤1   | ≤1  | ≤1  | 8   | 16     | >2  | >2  | 8   | 0,5   | >16 | ≤1  | >128 | 2   |
| 4-C                                              |          |        | Grey                 | Glistening, smooth | >16                                                                 | >64 | >128 | 1     | >2  | >128 | >16 | >8  | >8  | 128    | >2  | >2  | 8   | 0,5   | >16 | ≤1  | >128 | 4   |
| 4-D                                              |          |        | Grey                 | Dry, rough         | >16                                                                 | >64 | >128 | 2     | >2  | >128 | >16 | >8  | >8  | 64     | >2  | >2  | 8   | 0,5   | >16 | ≤1  | >128 | ≤1  |
| 5-A                                              | Tissue   | Sep 22 | Small colony variant |                    | >16                                                                 | >64 | >128 | 0,25  | >2  | >128 | >16 | >8  | >8  | >128   | >2  | >2  | 32  | 0,5   | >16 | ≤1  | >128 | >4  |
| 5-B                                              |          |        | Whitish              | Glistening, smooth | >16                                                                 | >64 | >128 | 2     | >2  | >128 | >16 | >8  | >8  | 128    | >2  | >2  | 8   | 0,5   | >16 | ≤1  | >128 | 4   |
| 5-C                                              |          |        | Grey                 | Glistening, smooth | >16                                                                 | >64 | >128 | 2     | >2  | >128 | >16 | >8  | >8  | 128    | >2  | >2  | 8   | 0,5   | >16 | ≤1  | >128 | 4   |
| 5-D                                              |          |        | Grey                 | Dry, rough         | >16                                                                 | >64 | >128 | 1     | >2  | >128 | >16 | >8  | >8  | 64     | >2  | >2  | 8   | 0,5   | >16 | ≤1  | >128 | 4   |

<sup>a</sup>Abbreviations of antibacterial agents: PIP: piperacillin, TZP: piperacillin-tazobactam, TEM: temocillin, FDC: cefiderocol, CTX: cefotaxime, CAZ: ceftazidime, CZA: ceftazidime-avibactam, C/T: ceftolozane-tazobactam, IPM: imipenem, MEM: meropenem, CIP: ciprofloxacin, LVX: levofloxacin, AMK: amikacin, TGC: tigecycline, CHL: chloramphenicol, CST: colistin, FOF: fosfomicin, SXT: trimethoprim-sulfamethoxazole

**A**

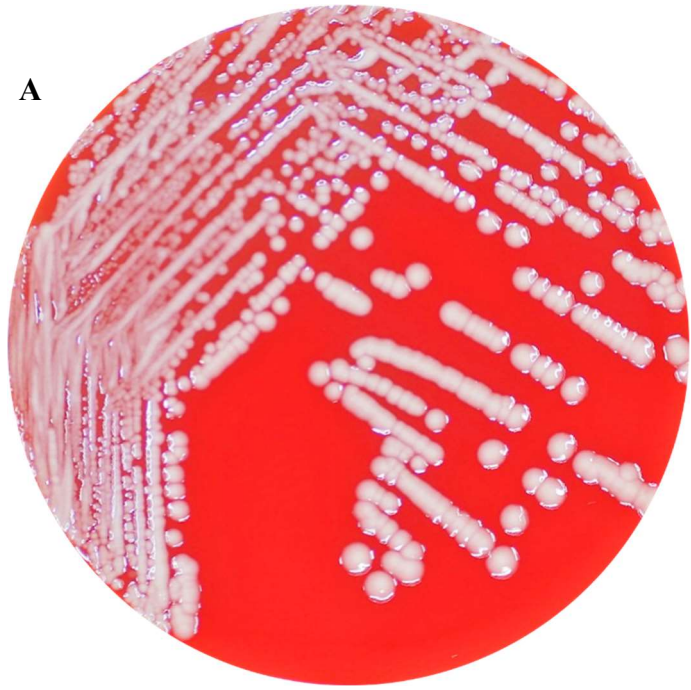

**B**

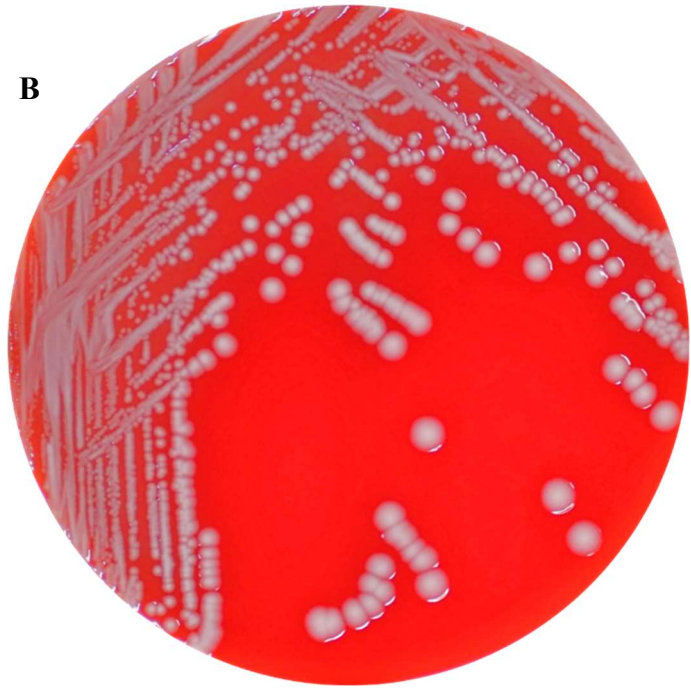

**C**

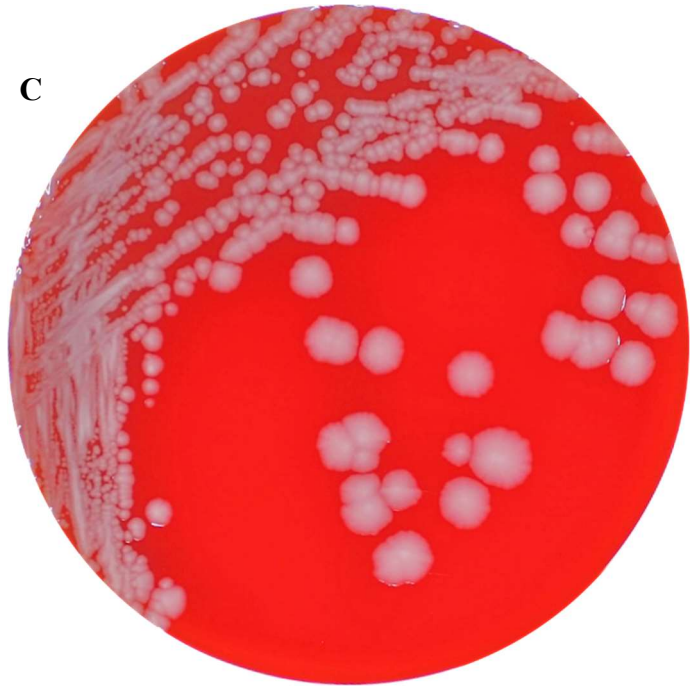

**D**

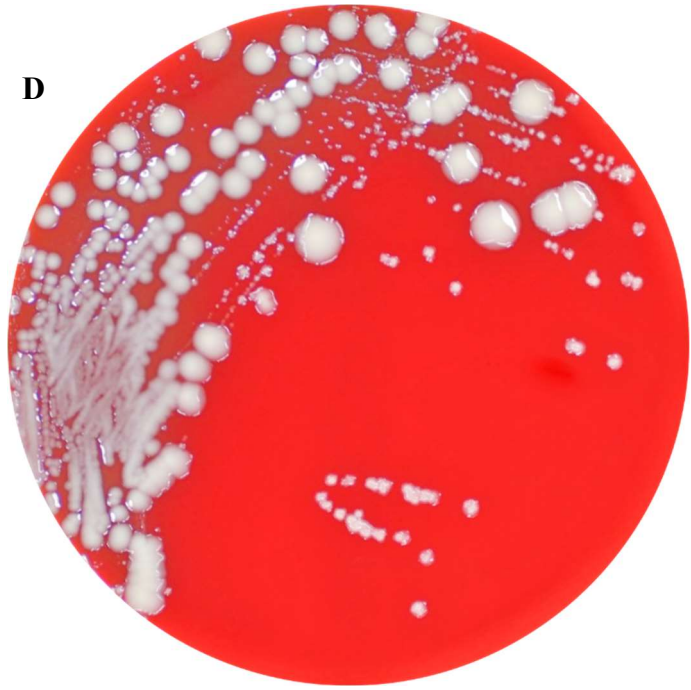



342 **Figure legends**

343 **FIG 1** Columbia blood agar plates showing the different colonial morphotypes of the *K.*  
344 *pneumoniae* isolates comprising regular sized colonies (wild-type) with glistening whitish  
345 (Figure 1-A) and grey (Figure 1-B), and dry and rough grey colonies (Figure 1-C), respectively,  
346 as well as tiny grey and whitish colonies displaying the SCV phenotype (Figure 1-D). Figure  
347 1-D also shows the hyper-splitting phenomenon of the SCV phenotype into the colony  
348 morphotypes shown in figures 1-A–C.

349

## 350 References

- 351 1. Wyres KL, Lam MMC, Holt KE. 2020. Population genomics of *Klebsiella pneumoniae*. *Nat Rev*  
352 *Microbiol* 18:344-359.
- 353 2. Antimicrobial Resistance C. 2022. Global burden of bacterial antimicrobial resistance in 2019:  
354 a systematic analysis. *Lancet* 399:629-655.
- 355 3. Ventola CL. 2015. The antibiotic resistance crisis: part 1: causes and threats. *P T* 40:277-83.
- 356 4. Avgoulea K, Pilato VD, Zarkotou O, Sennati S, Politi L, Cannatelli A, Themeli-Digalaki K, Giani T,  
357 Tsakris A, Rossolini GM, Pournaras S. 2018. Characterization of Extensively Drug-Resistant or  
358 Pandrug-Resistant Sequence Type 147 and 101 OXA-48-Producing *Klebsiella pneumoniae*  
359 Causing Bloodstream Infections in Patients in an Intensive Care Unit. *Antimicrobial Agents and*  
360 *Chemotherapy* 62:10.1128/aac.02457-17.
- 361 5. Navon-Venezia S, Kondratyeva K, Carattoli A. 2017. *Klebsiella pneumoniae*: a major worldwide  
362 source and shuttle for antibiotic resistance. *FEMS Microbiology Reviews* 41:252-275.
- 363 6. Russo TA, Marr CM. 2019. Hypervirulent *Klebsiella pneumoniae*. *Clin Microbiol Rev* 32.
- 364 7. Eger E, Schwabe M, Schuldig L, Hubner NO, Bohnert JA, Bornscheuer UT, Heiden SE, Muller JU,  
365 Adnan F, Becker K, Correa-Martinez CL, Guenther S, Idelevich EA, Baecker D, Schaufler K. 2022.  
366 Extensively Drug-Resistant *Klebsiella pneumoniae* Counteracts Fitness and Virulence Costs  
367 That Accompanied Ceftazidime-Avibactam Resistance Acquisition. *Microbiol Spectr*  
368 10:e0014822.
- 369 8. Lan P, Jiang Y, Zhou J, Yu Y. 2021. A global perspective on the convergence of hypervirulence  
370 and carbapenem resistance in *Klebsiella pneumoniae*. *J Glob Antimicrob Resist* 25:26-34.
- 371 9. Heiden SE, Hubner NO, Bohnert JA, Heidecke CD, Kramer A, Balau V, Gierer W, Schaefer S,  
372 Eckmanns T, Gatermann S, Eger E, Guenther S, Becker K, Schaufler K. 2020. A *Klebsiella*  
373 *pneumoniae* ST307 outbreak clone from Germany demonstrates features of extensive drug  
374 resistance, hypermucoviscosity, and enhanced iron acquisition. *Genome Med* 12:113.
- 375 10. Ster C, Lebeau V, Leclerc J, Fugere A, Veh KA, Roy JP, Malouin F. 2017. In vitro antibiotic  
376 susceptibility and biofilm production of *Staphylococcus aureus* isolates recovered from bovine  
377 intramammary infections that persisted or not following extended therapies with cephapirin,  
378 pirlimycin or ceftiofur. *Vet Res* 48:56.
- 379 11. Ernst CM, Braxton JR, Rodriguez-Osorio CA, Zagieboylo AP, Li L, Pironti A, Manson AL, Nair AV,  
380 Benson M, Cummins K, Clatworthy AE, Earl AM, Cosimi LA, Hung DT. 2020. Adaptive evolution  
381 of virulence and persistence in carbapenem-resistant *Klebsiella pneumoniae*. *Nat Med* 26:705-  
382 711.
- 383 12. Proctor RA, von Eiff C, Kahl BC, Becker K, McNamara P, Herrmann M, Peters G. 2006. Small  
384 colony variants: a pathogenic form of bacteria that facilitates persistent and recurrent  
385 infections. *Nat Rev Microbiol* 4:295-305.
- 386 13. Becker K. 2023. Detection, Identification and Diagnostic Characterization of the Staphylococcal  
387 Small Colony-Variant (SCV) Phenotype. *Antibiotics (Basel)* 12.
- 388 14. Tuchscher L, Medina E, Hussain M, Volker W, Heitmann V, Niemann S, Holzinger D, Roth J,  
389 Proctor RA, Becker K, Peters G, Loffler B. 2011. *Staphylococcus aureus* phenotype switching:  
390 an effective bacterial strategy to escape host immune response and establish a chronic  
391 infection. *EMBO Mol Med* 3:129-41.
- 392 15. Kahl BC, Becker K, Loffler B. 2016. Clinical Significance and Pathogenesis of Staphylococcal  
393 Small Colony Variants in Persistent Infections. *Clin Microbiol Rev* 29:401-27.
- 394 16. Proctor RA, Kriegeskorte A, Kahl BC, Becker K, Loffler B, Peters G. 2014. *Staphylococcus aureus*  
395 Small Colony Variants (SCVs): a road map for the metabolic pathways involved in persistent  
396 infections. *Front Cell Infect Microbiol* 4:99.
- 397 17. Kriegeskorte A, Grubmuller S, Huber C, Kahl BC, von Eiff C, Proctor RA, Peters G, Eisenreich W,  
398 Becker K. 2014. *Staphylococcus aureus* small colony variants show common metabolic features  
399 in central metabolism irrespective of the underlying auxotrophism. *Front Cell Infect Microbiol*  
400 4:141.

- 401 18. Oliver A, Canton R, Campo P, Baquero F, Blazquez J. 2000. High Frequency of Hypermutable  
402 *Pseudomonas aeruginosa* in Cystic Fibrosis Lung Infection. *Science* 288:1251-4.
- 403 19. Prunier AL, Malbruny B, Laurans M, Brouard J, Duhamel JF, Leclercq R. 2003. High Rate of  
404 Macrolide Resistance in *Staphylococcus aureus* Strains from Patients with Cystic Fibrosis  
405 Reveals High Proportions of Hypermutable Strains. *J Infect Dis* 187:1709-16.
- 406 20. Schaaff F, Bierbaum G, Baumert N, Bartmann P, Sahl HG. 2003. Mutations are involved in  
407 emergence of aminoglycoside-induced small colony variants of *Staphylococcus aureus*. *Int J*  
408 *Med Microbiol* 293:427-35.
- 409 21. Besier S, Zander J, Kahl BC, Kraiczky P, Brade V, Wichelhaus TA. 2008. The Thymidine-Dependent  
410 Small-Colony-Variant Phenotype Is Associated with Hypermutability and Antibiotic Resistance  
411 in Clinical *Staphylococcus aureus* Isolates. *Antimicrob Agents Chemother* 52:2183-9.
- 412 22. Morelli P, De Alessandri A, Manno G, Marchese A, Bassi M, Lobello R, Minicucci L, Bandettini  
413 R. 2015. Characterization of *Staphylococcus aureus* small colony variant strains isolated from  
414 Italian patients attending a regional cystic fibrosis care centre. *New Microbiol* 38:235-43.
- 415 23. Benner EJ, Micklewit JS, Brodie JL, Kirby WM. 1965. Natural and Acquired Resistance of  
416 *Klebsiella-Aerobacter* to Cephalothin and Cephaloridine. *Proc Soc Exp Biol Med* 119:536-41.
- 417 24. Musher DM, Baughn RE, Merrell GL. 1979. Selection of Small-Colony Variants of  
418 Enterobacteriaceae by in Vitro Exposure to Aminoglycosides: Pathogenicity for Experimental  
419 Animals. *The Journal of Infectious Diseases* 140:209-214.
- 420 25. Murray BE, Moellering RC, Jr. 1982. In-Vivo Acquisition of Two Different Types of  
421 Aminoglycoside Resistance by a Single Strain of *Klebsiella pneumoniae* Causing Severe  
422 Infection. *Ann Intern Med* 96:176-80.
- 423 26. Srinivasan VB, Venkataramaiah M, Mondal A, Vaidyanathan V, Govil T, Rajamohan G. 2012.  
424 Functional characterization of a novel outer membrane porin *KpnO*, regulated by PhoBR two-  
425 component system in *Klebsiella pneumoniae* NTUH-K2044. *PLoS One* 7:e41505.
- 426 27. Silva A, Sousa AM, Alves D, Lourenco A, Pereira MO. 2016. Heteroresistance to colistin in  
427 *Klebsiella pneumoniae* is triggered by small colony variants sub-populations within biofilms.  
428 *Pathog Dis* 74.
- 429 28. Standardization IOF. 2019. ISO 20776-1: 2019. Susceptibility testing of infectious agents and  
430 evaluation of performance of antimicrobial susceptibility test devices—Part 1: Broth micro-  
431 dilution reference method for testing the in vitro activity of antimicrobial agents against  
432 rapidly growing aerobic bacteria involved in infectious diseases. ISO.
- 433 29. CLSI. 2018. Methods for dilution antimicrobial susceptibility tests for bacteria that grow  
434 aerobically. 11th ed. CLSI standard M07. Clinical and Laboratory Standards Institute, Wayne,  
435 PA.
- 436 30. EUCAST. 2023. Routine and extended internal quality control for MIC determination and disk  
437 diffusion as recommended by EUCAST. Version 13.2, 2023. <http://www.eucast.org>. The  
438 European Committee on Antimicrobial Susceptibility Testing.
- 439 31. EUCAST. 2023. Breakpoint tables for interpretation of MICs and zone diameters. Version 13.1,  
440 2023. <http://www.eucast.org>. The European Committee on Antimicrobial Susceptibility  
441 Testing.
- 442 32. Prjibelski A, Antipov D, Meleshko D, Lapidus A, Korobeynikov A. 2020. Using SPAdes De Novo  
443 Assembler. *Curr Protoc Bioinformatics* 70:e102.
- 444 33. Vasimuddin M, Misra S, Li H, Aluru S. Efficient Architecture-Aware Acceleration of BWA-MEM  
445 for Multicore Systems, p 314-324. *In* (ed),
- 446 34. Wick RR, Holt KE. 2022. Polypolish: Short-read polishing of long-read bacterial genome  
447 assemblies. *PLoS Comput Biol* 18:e1009802.
- 448 35. Lam MMC, Wick RR, Watts SC, Cerdeira LT, Wyres KL, Holt KE. 2021. A genomic surveillance  
449 framework and genotyping tool for *Klebsiella pneumoniae* and its related species complex. *Nat*  
450 *Commun* 12:4188.
- 451 36. Wyres KL, Wick RR, Gorrie C, Jenney A, Follador R, Thomson NR, Holt KE. 2016. Identification  
452 of *Klebsiella* capsule synthesis loci from whole genome data. *Microb Genom* 2:e000102.

- 453 37. Lam MMC, Wick RR, Judd LM, Holt KE, Wyres KL. 2022. Kaptive 2.0: updated capsule and  
454 lipopolysaccharide locus typing for the *Klebsiella pneumoniae* species complex. Microb Genom  
455 8.
- 456 38. Jin X, Chen Q, Shen F, Jiang Y, Wu X, Hua X, Fu Y, Yu Y. 2021. Resistance evolution of  
457 hypervirulent carbapenem-resistant *Klebsiella pneumoniae* ST11 during treatment with  
458 tigecycline and polymyxin. Emerg Microbes Infect 10:1129-1136.
- 459 39. Tuchscher L, Loffler B, Proctor RA. 2020. Persistence of *Staphylococcus aureus*: Multiple  
460 Metabolic Pathways Impact the Expression of Virulence Factors in Small-Colony Variants  
461 (SCVs). Front Microbiol 11:1028.
- 462 40. Jacobsen K. 1910. Mitteilungen über einen variablen Typhusstamm (Bacterium typhi  
463 mutabile), sowie über eine eigentümliche hemmende Wirkung des gewöhnlichen agar,  
464 verursacht durch autoklavierung. Zentralbl Bakteriol[Orig A] 56:208-216.
- 465 41. Haussler S, Ziegler I, Lottel A, Gotz FV, Rohde M, Wehmhohner D, Saravanamuthu S, Tummler  
466 B, Steinmetz I. 2003. Highly adherent small-colony variants of *Pseudomonas aeruginosa* in  
467 cystic fibrosis lung infection. J Med Microbiol 52:295-301.
- 468 42. Haussler S, Lehmann C, Breselge C, Rohde M, Classen M, Tummler B, Vandamme P, Steinmetz  
469 I. 2003. Fatal Outcome of Lung Transplantation in Cystic Fibrosis Patients due to Small-Colony  
470 Variants of the *Burkholderia cepacia* Complex. Eur J Clin Microbiol Infect Dis 22:249-53.
- 471 43. Proctor RA, van Langevelde P, Kristjansson M, Maslow JN, Arbeit RD. 1995. Persistent and  
472 Relapsing Infections Associated with Small-Colony Variants of *Staphylococcus aureus*. Clin  
473 Infect Dis 20:95-102.
- 474 44. Proctor RA, von Humboldt A. 1998. Bacterial energetics and antimicrobial resistance. Drug  
475 Resist Updat 1:227-35.
- 476 45. Mitsuyama J, Yamada H, Maehana J, Fukuda Y, Kurose S, Minami S, Todo Y, Watanabe Y, Narita  
477 H. 1997. Characteristics of quinolone-induced small colony variants in *Staphylococcus aureus*.  
478 J Antimicrob Chemother 39:697-705.
- 479 46. Baumert N, von Eiff C, Schaaff F, Peters G, Proctor RA, Sahl HG. 2002. Physiology and Antibiotic  
480 Susceptibility of *Staphylococcus aureus* Small Colony Variants. Microb Drug Resist 8:253-60.
- 481 47. Li W, Li Y, Wu Y, Cui Y, Liu Y, Shi X, Zhang Q, Chen Q, Sun Q, Hu Q. 2016. Phenotypic and genetic  
482 changes in the life cycle of small colony variants of *Salmonella enterica* serotype *Typhimurium*  
483 induced by streptomycin. Ann Clin Microbiol Antimicrob 15:37.
- 484 48. Webb JS, Lau M, Kjelleberg S. 2004. Bacteriophage and Phenotypic Variation in *Pseudomonas*  
485 *aeruginosa* Biofilm Development. J Bacteriol 186:8066-73.
- 486 49. Al Laham N, Rohde H, Sander G, Fischer A, Hussain M, Heilmann C, Mack D, Proctor R, Peters  
487 G, Becker K, von Eiff C. 2007. Augmented expression of polysaccharide intercellular adhesin in  
488 a defined *Staphylococcus epidermidis* mutant with the small-colony-variant phenotype. J  
489 Bacteriol 189:4494-501.
- 490 50. Allegrucci M, Sauer K. 2007. Characterization of Colony Morphology Variants Isolated from  
491 *Streptococcus pneumoniae* Biofilms. J Bacteriol 189:2030-8.
- 492 51. Millette G, Seguin DL, Isabelle C, Chamberland S, Lucier JF, Rodrigue S, Cantin AM, Malouin F.  
493 2023. *Staphylococcus aureus* Small-Colony Variants from Airways of Adult Cystic Fibrosis  
494 Patients as Precursors of Adaptive Antibiotic-Resistant Mutations. Antibiotics (Basel) 12.
- 495 52. Craft KM, Nguyen JM, Berg LJ, Townsend SD. 2019. Methicillin-resistant *Staphylococcus aureus*  
496 (MRSA): antibiotic-resistance and the biofilm phenotype. Medchemcomm 10:1231-1241.
- 497 53. Mirani ZA, Aziz M, Khan SI. 2015. Small colony variants have a major role in stability and  
498 persistence of *Staphylococcus aureus* biofilms. J Antibiot (Tokyo) 68:98-105.
- 499 54. Becker K, Laham NA, Fegeler W, Proctor RA, Peters G, von Eiff C. 2006. Fourier-Transform  
500 Infrared Spectroscopic Analysis Is a Powerful Tool for Studying the Dynamic Changes in  
501 *Staphylococcus aureus* Small-Colony Variants. J Clin Microbiol 44:3274-8.
- 502 55. Tuchscher L, Bischoff M, Lattar SM, Noto Llana M, Pfortner H, Niemann S, Geraci J, Van de  
503 Vyver H, Fraunholz MJ, Cheung AL, Herrmann M, Volker U, Sordelli DO, Peters G, Loffler B.  
504 2015. Sigma Factor SigB Is Crucial to Mediate *Staphylococcus aureus* Adaptation during Chronic  
505 Infections. PLoS Pathog 11:e1004870.

- 506 56. Tuchscher L, Heitmann V, Hussain M, Viemann D, Roth J, von Eiff C, Peters G, Becker K, Loffler  
507 B. 2010. *Staphylococcus aureus* Small-Colony Variants Are Adapted Phenotypes for  
508 Intracellular Persistence. *J Infect Dis* 202:1031-40.
- 509 57. Guerillot R, Kostoulias X, Donovan L, Li L, Carter GP, Hachani A, Vandellannoote K, Giulieri S,  
510 Monk IR, Kunimoto M, Starrs L, Burgio G, Seemann T, Peleg AY, Stinear TP, Howden BP. 2019.  
511 Unstable chromosome rearrangements in *Staphylococcus aureus* cause phenotype switching  
512 associated with persistent infections. *Proc Natl Acad Sci U S A* 116:20135-20140.
- 513 58. Pader V, James EH, Painter KL, Wigneshweraraj S, Edwards AM. 2014. The Agr Quorum-Sensing  
514 System Regulates Fibronectin Binding but Not Hemolysis in the Absence of a Functional  
515 Electron Transport Chain. *Infect Immun* 82:4337-47.
- 516 59. Brandis G, Cao S, Huseby DL, Hughes D. 2017. Having your cake and eating it - *Staphylococcus*  
517 *aureus* small colony variants can evolve faster growth rate without losing their antibiotic  
518 resistance. *Microb Cell* 4:275-277.
- 519 60. Smith EE, Buckley DG, Wu Z, Saenphimmachak C, Hoffman LR, D'Argenio DA, Miller SI, Ramsey  
520 BW, Speert DP, Moskowitz SM, Burns JL, Kaul R, Olson MV. 2006. Genetic adaptation by  
521 *Pseudomonas aeruginosa* to the airways of cystic fibrosis patients. *Proc Natl Acad Sci U S A*  
522 103:8487-92.
- 523 61. Witzany C, Regoes RR, Iglar C. 2022. Assessing the relative importance of bacterial resistance,  
524 persistence and hyper-mutation for antibiotic treatment failure. *Proc Biol Sci* 289:20221300.
- 525 62. Mena A, Smith EE, Burns JL, Speert DP, Moskowitz SM, Perez JL, Oliver A. 2008. Genetic  
526 Adaptation of *Pseudomonas aeruginosa* to the Airways of Cystic Fibrosis Patients Is Catalyzed  
527 by Hypermutation. *J Bacteriol* 190:7910-7.
- 528 63. Falcone M, Giordano C, Barnini S, Tiseo G, Leonildi A, Malacarne P, Menichetti F, Carattoli A.  
529 2020. Extremely drug-resistant NDM-9-producing ST147 *Klebsiella pneumoniae* causing  
530 infections in Italy, May 2020. *Euro Surveill* 25.
